# Supplementary material for: Effect of Different Vegetation Restoration on Recovery of Compaction-Induced Soil Degradation in Hyrcanian Mixed Forests: Influence on Soil C and N Pools and Enzyme Activities
Source: MDPI journal article supplement (doi:10.3390/f14030603), 2023-03-17
Supplement: s1 [file s1]

**Table S1.** Pearson correlation between soil biological and biochemical properties and enzymes activity with soil physio-chemical and litter properties in the different treatments of tree species. ED = Earthworm density; EB = Earthworm biomass; FRB = Fine root biomass; SMR = Soil microbial respiration; MBC = Microbial biomass carbon;  $\text{NH}_4^+$  = ammonium;  $\text{NO}_3^-$  = nitrate; N Min = Nitrogen mineralization; MBN = Microbial biomass nitrogen; Enzymes activity; Urease; APH = Acid phosphatase; Arylsulfatase; Invertase; NAG =  $\beta$ -N-acetylglucosaminidase; Litter T = Litter Thickness; CL = Litter C; NL = Litter N (%); C/NL = Litter C/N ratio; PL = Litter P; KL = Litter K; BD = Bulk density; TP = Total porosity; MP = Macroporosity; PR = Penetration resistance; SM = Soil moisture; AS = Aggregate stability; CS = Soil C; NS = Soil N; C/NS = Soil C/N; Fulvic = Fulvic acid; Humic = Humic acid.

| Soil properties              |                              | Litter properties        |        |                |                | Soil physical properties |                   |                   |        |        |         |        |        |         |        |
|------------------------------|------------------------------|--------------------------|--------|----------------|----------------|--------------------------|-------------------|-------------------|--------|--------|---------|--------|--------|---------|--------|
|                              |                              | Litter $\tau$            | CL     | NL             | C/NL           | PL                       | KL                | BD                | TP     | MP     | PR      | SM     | AS     | Sand    | Clay   |
| Biological properties        | ED                           | 0.04                     | -0.14  | 0.79**         | -0.89**        | 0.72**                   | 0.76**            | -0.66**           | 0.59** | 0.81** | -0.70** | 0.84** | 0.91** | -0.43** | 0.45** |
|                              | EB                           | 0.07                     | -0.02  | 0.85**         | -0.88**        | 0.79**                   | 0.86**            | -0.57**           | 0.50** | 0.75** | -0.62** | 0.88** | 0.91** | -0.45** | 0.48** |
| C and N Microbial properties | FRB                          | 0.24*                    | 0.16   | 0.93**         | -0.89**        | 0.86**                   | 0.89**            | -0.52**           | 0.45** | 0.68** | -0.66** | 0.92** | 0.92** | -0.46** | 0.52** |
|                              | SMR                          | 0.12                     | 0.09   | 0.90**         | -0.89**        | 0.85**                   | 0.92**            | -0.43**           | 0.35** | 0.64** | -0.63** | 0.94** | 0.90** | -0.45** | 0.49** |
|                              | MBC                          | 0.21                     | 0.05   | 0.88**         | -0.89**        | 0.81**                   | 0.83**            | -0.64**           | 0.58** | 0.78** | -0.70** | 0.87** | 0.94** | -0.45** | 0.47** |
|                              | NH <sub>4</sub> <sup>+</sup> | 0.22                     | 0.12   | 0.90**         | -0.87**        | 0.85**                   | 0.92**            | -0.54**           | 0.48** | 0.74** | -0.67** | 0.86** | 0.89** | -0.46** | 0.49** |
| Enzymes activity             | NO <sub>3</sub> <sup>-</sup> | 0.24*                    | 0.09   | 0.93**         | -0.93**        | 0.87**                   | 0.92**            | -0.57**           | 0.49** | 0.75** | -0.73** | 0.89** | 0.92** | -0.86** | 0.51** |
|                              | N Min                        | 0.13                     | 0.03   | 0.89**         | -0.89**        | 0.84**                   | 0.92**            | -0.51**           | 0.44** | 0.72** | -0.63** | 0.88** | 0.90** | -0.45** | 0.49** |
|                              | MBN                          | 0.12                     | 0.04   | 0.89**         | -0.90**        | 0.82**                   | 0.87**            | -0.62**           | 0.56** | 0.79** | -0.68** | 0.87** | 0.93** | -0.46** | 0.51** |
|                              | Urease                       | 0.19                     | 0.14   | 0.93**         | -0.91**        | 0.87**                   | 0.93**            | -0.43**           | 0.36*  | 0.64** | -0.67** | 0.94** | 0.92** | -0.43** | 0.49** |
|                              | APH                          | 0.29**                   | 0.01   | 0.86**         | -0.91**        | 0.77**                   | 0.80**            | -0.66**           | 0.59** | 0.81** | -0.75** | 0.86** | 0.98** | -0.43** | 0.45** |
|                              | Arylsulfatase                | 0.21                     | 0.09   | 0.92**         | -0.92**        | 0.83**                   | 0.89**            | -0.50**           | 0.43** | 0.69** | -0.71** | 0.92** | 0.93** | -0.46** | 0.49** |
|                              | Invertase                    | 0.20                     | 0.03   | 0.89**         | -0.92**        | 0.81**                   | 0.87**            | -0.60**           | 0.53** | 0.78** | -0.72** | 0.88** | 0.94** | -0.47** | 0.51** |
|                              | NAG                          | 0.11                     | -0.02  | 0.85**         | -0.89**        | 0.78**                   | 0.87**            | -0.52**           | 0.45** | 0.73** | -0.67** | 0.88** | 0.91** | -0.46** | 0.51** |
| Soil properties              |                              | Soil chemical properties |        |                |                |                          |                   |                   |        |        |         |        |        |         |        |
|                              |                              | Silt                     | pH     | C <sub>s</sub> | N <sub>s</sub> | C/N <sub>s</sub>         | C <sub>stor</sub> | N <sub>stor</sub> | P      | K      | Ca      | Mg     | Fulvic | Humic   |        |
| Biological properties        | ED                           | 0.15                     | 0.96** | 0.41**         | 0.89**         | -0.86**                  | 0.09              | 0.76**            | 0.89** | 0.92** | 0.93**  | 0.92** | 0.94** | 0.91**  |        |
|                              | EB                           | 0.15                     | 0.98** | 0.44**         | 0.92**         | -0.86**                  | 0.17              | 0.82**            | 0.94** | 0.94** | 0.97**  | 0.96** | 0.97** | 0.96**  |        |
| C and N Microbial properties | FRB                          | 0.13                     | 0.94** | 0.63**         | 0.96**         | -0.84**                  | 0.37**            | 0.89**            | 0.91** | 0.96** | 0.98**  | 0.93** | 0.96** | 0.97**  |        |
|                              | SMR                          | 0.14                     | 0.96** | 0.54**         | 0.93**         | -0.86**                  | 0.33**            | 0.88**            | 0.93** | 0.93** | 0.96**  | 0.93** | 0.96** | 0.97**  |        |
|                              | MBC                          | 0.16                     | 0.96** | 0.56**         | 0.94**         | -0.86**                  | 0.24*             | 0.84**            | 0.90** | 0.97** | 0.97**  | 0.94** | 0.97** | 0.95**  |        |
|                              | NH <sub>4</sub> <sup>+</sup> | 0.15                     | 0.94** | 0.52**         | 0.91**         | -0.85**                  | 0.25*             | 0.82**            | 0.95** | 0.96** | 0.98**  | 0.98** | 0.97** | 0.98**  |        |
| Enzymes activity             | NO <sub>3</sub> <sup>-</sup> | 0.16                     | 0.94** | 0.58**         | 0.94**         | -0.87**                  | 0.30**            | 0.85**            | 0.95** | 0.98** | 0.99**  | 0.97** | 0.98** | 0.98**  |        |
|                              | N Min                        | 0.14                     | 0.96** | 0.46**         | 0.90**         | -0.85**                  | 0.21              | 0.82**            | 0.97** | 0.94** | 0.97**  | 0.98** | 0.97** | 0.98**  |        |
|                              | MBN                          | 0.15                     | 0.97** | 0.52**         | 0.93**         | -0.86**                  | 0.22              | 0.83**            | 0.95** | 0.97** | 0.99**  | 0.98** | 0.98** | 0.98**  |        |
|                              | Urease                       | 0.13                     | 0.95** | 0.58**         | 0.95**         | -0.88**                  | 0.37**            | 0.91**            | 0.93** | 0.94** | 0.97**  | 0.94** | 0.96** | 0.98**  |        |
|                              | APH                          | 0.15                     | 0.94** | 0.54**         | 0.93**         | -0.87**                  | 0.22              | 0.81**            | 0.89** | 0.95** | 0.96**  | 0.94** | 0.96** | 0.94**  |        |
|                              | Arylsulfatase                | 0.15                     | 0.96** | 0.58**         | 0.95**         | -0.88**                  | 0.33**            | 0.88**            | 0.92** | 0.95** | 0.97**  | 0.94** | 0.97** | 0.97**  |        |
|                              | Invertase                    | 0.16                     | 0.97** | 0.55**         | 0.94**         | -0.86**                  | 0.26*             | 0.84**            | 0.93** | 0.97** | 0.98**  | 0.96** | 0.98** | 0.97**  |        |
|                              | NAG                          | 0.15                     | 0.98** | 0.46**         | 0.91**         | -0.87**                  | 0.21              | 0.83**            | 0.93** | 0.92** | 0.96**  | 0.95** | 0.96** | 0.96**  |        |
